# Supplementary material for: The important effect of ligand architecture on the selectivity of metal ion recognition in An(iii)/Ln(iii) separation with N-donor extractants
Source: Royal Society of Chemistry journal article supplement (doi:10.1039/b209840g), 2002-01-01
Supplement: b209840g.doc [file b209840g.doc]

# Supplementary Information

RMN 1H (CD3CN,  400 MHz, 298 K),  (ppm) :

tpzcn: 8,65 (d, J = 1,5 Hz, 4H, H3) ; 8,30 (dd, J = 2,3 Hz, J = 1,5 Hz, 4H, H6), 8,28 (d, J = 2,3 Hz, 4H, H5) ; 3,79, 3,70 (AB, JAB = 14,3 Hz, 8H, HA, HB) ; 2.89 (m, 2H, HC) ; 2,13 (m, 2H, HF) ; 1,77 (m, 2H, HG) ; 1,20 (m, 4H, HE, HD).

R= (CH2)2 tpzen

R= (CH2)3 tpztn

tpzen: 8.62 ( H3, d, 4H), 8.42 (H6, dd, 4H), 8.40 (H5, d, 4H), 3.80 (s, 8H, Ha, Hb), 2.75 (s, 4H, -N-CH2-CH2-N);

tpztn: 8.60 ( H3, d, 4H), 8.43 (H6, dd, 4H); 8.39 (H5, d, 4H), 3.77 (s, 8H, Ha, Hb), 2.55 (t, 4H, -N-*CH2*-CH2-*CH2*-N), 1.76 (q, 2H, -N-CH2-*CH2*-CH2-N).
